# Supplementary material for: Novel Insights into the Cellular Mechanisms of the Anti-inflammatory Effects of NF-κB Essential Modulator Binding Domain Peptides
Source: PubMed Central journal article supplement — J Biol Chem. 2010 Feb 18;285(18):13498–506. doi: 10.1074/jbc.M109.099895 (PMC2859510; doi:10.1074/jbc.m109.099895), 2010-02-18
Supplement: supp_M109.099895_Supplementals.pdf [file supp_M109.099895_Supplementals.pdf]

Supplementary Figure S1

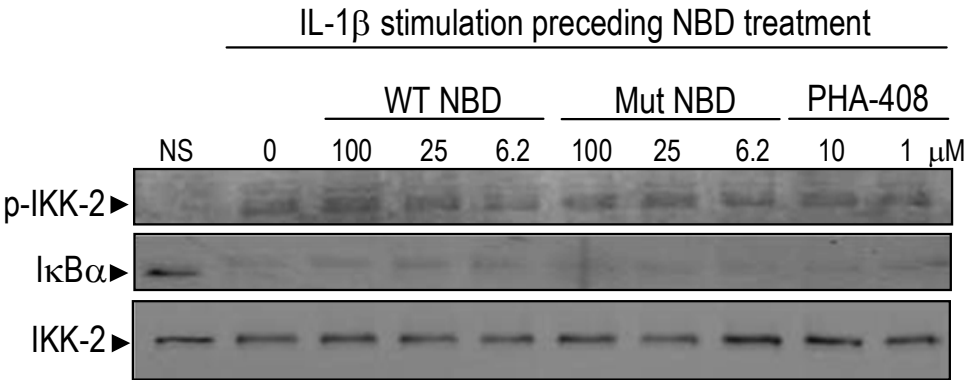

Effects of NBD peptides added to lysates from IL-1 $\beta$  treated-cells. RASF were stimulated for 10 min with 1 ng/ml IL-1 $\beta$ . Cell lysates were incubated for 1 h with NBD peptides or PHA-408 then subjected to Western blot analysis. NS, nonstimulation. NBD peptides used were IKK-2 11-mer.

Supplementary Figure S2

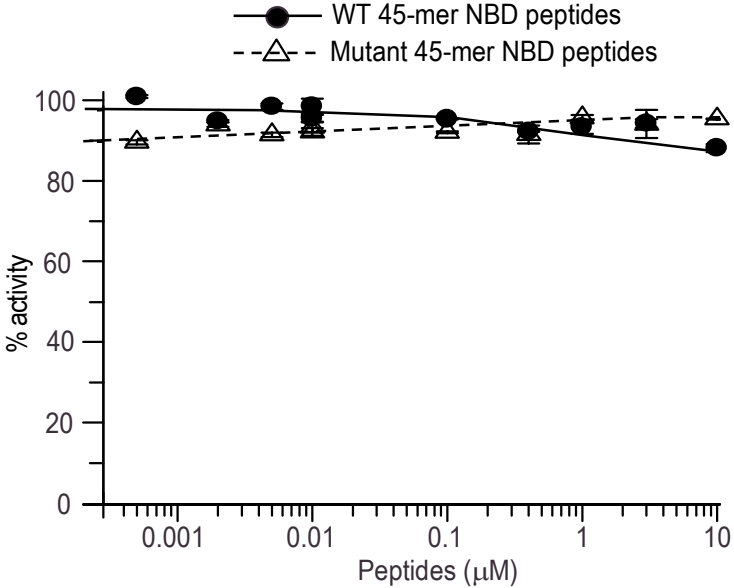

Negative control for the Alphascreen assay. GST-FLAG fusion construct was used to monitor unspecific binding of NBD containing peptides.

Supplementary Figure S3

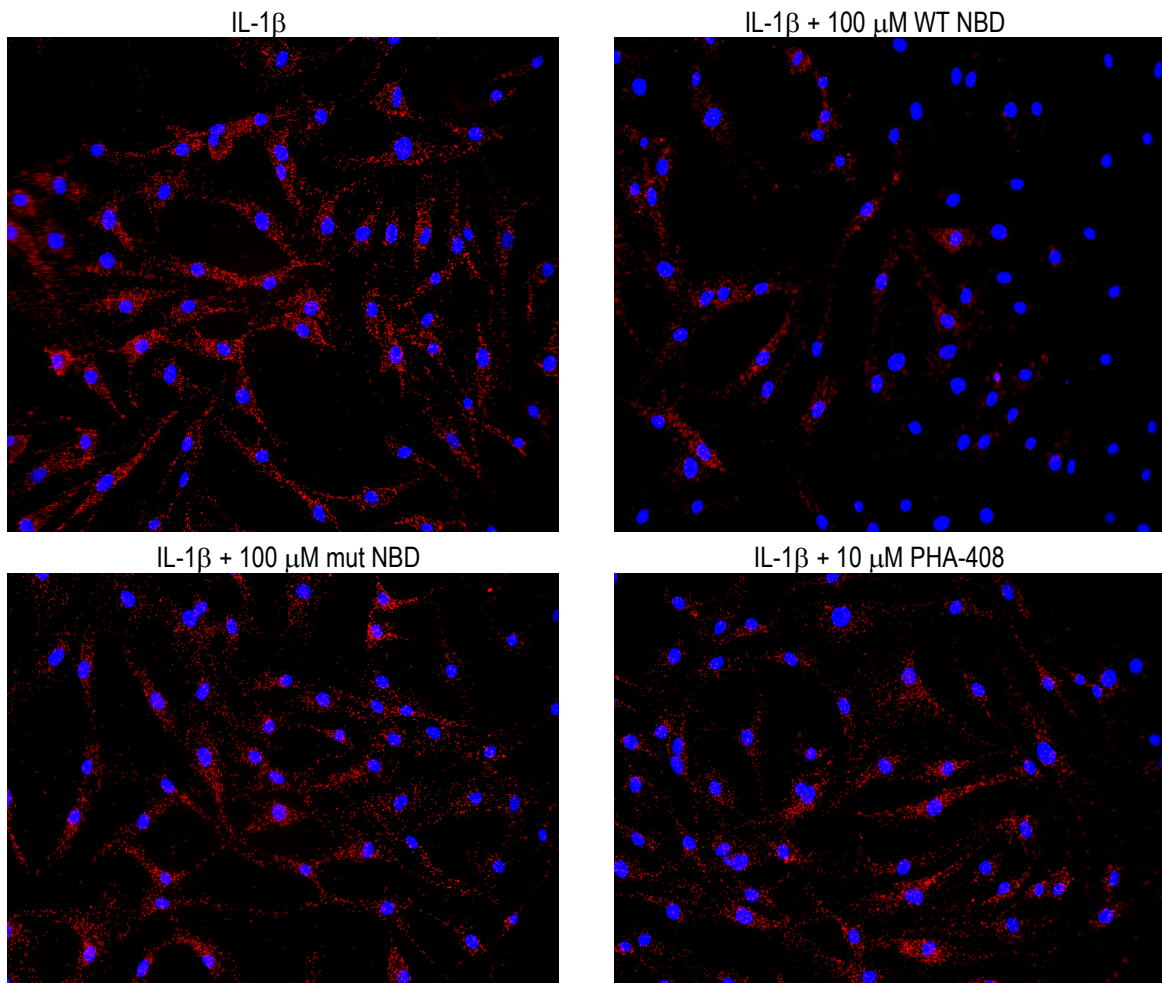

Lack of PHA-408 effects on NEMO-IKK-2 interactions in RASF. RASF cells were incubated with the indicated concentrations of WT or mut NBD peptides or PHA-408 for 30 min before stimulation with 1 ng/ml IL-1 $\beta$  for 15 min. NEMO-IKK2 interactions were visualized at 20x magnification (A) using PLA as detailed under “Experimental Procedures”. NBD peptides used were IKK-2 11-mer.

Supplementary Table 1

| Peptides            | AlphaScreen<br>IC <sub>50</sub> | FRET<br>IC <sub>50</sub> | Fluorescence<br>Polarization IC <sub>50</sub> | Biacore<br>K <sub>d</sub> |
|---------------------|---------------------------------|--------------------------|-----------------------------------------------|---------------------------|
| WT NBP<br>(45-mer)  | 15- 47 nM                       | 1 - 7 nM                 | 15 - 30 nM                                    | 76.2 nM                   |
| Mut NBP<br>(45-mer) | 4,7 μM                          | >30 μM                   | >1 μM                                         | ND                        |
| WT NBP<br>(11-mer)  | > 100 μM                        | > 100 μM                 | > 10 μM                                       | > 100 μM                  |

Comparison of the potency of NBD containing peptides in various biochemical assays. The ability of NBD peptides to inhibit the binding of FLAG-full length IKK-2 and GST-NEMO-(2-200) (Alphascreen), biotinylated IKK-1/2 chimeric 44-mer peptide and NEMO-(2-200) (FRET), TAMRA-IKK-2 45-mer peptide and NEMO-(2-200) (fluorescence polarization), IKK-2 45-mer peptide and biotinylated- NEMO-(2-200) (biacore) was measured. ND, not determined.
